# Supplementary material for: Ulipristal Acetate Modifies miRNA Expression in Both Superficial and Basal Layers of the Human Endometrium
Source: MDPI journal article supplement (doi:10.3390/jcm10194442), 2021-09-27
Supplement: s1 [file s1]

**Table S1.** Population and endometrial characteristics.

|                                                | <b>Proliferative Phase Group<br/>(n = 8)</b> | <b>Secretory Phase Group<br/>(n = 6)</b> | <b>UPA Group<br/>(n = 7)</b> | <b>p</b>          |
|------------------------------------------------|----------------------------------------------|------------------------------------------|------------------------------|-------------------|
| Age (years) median (IQR)                       | 47.5 (45.3-50.5)                             | 47.0 (46.0-49.3)                         | 48.0 (45.0-50.0)             | 0.95 <sup>1</sup> |
| BMI kg/m <sup>2</sup> mean (CI95%)             | 27.2 (23.2-31.2)                             | 27.9 (22.1-33.7)                         | 28.0 (21.9-34.0)             | 0.96 <sup>2</sup> |
| Tobacco smoking n (%)                          | 0 (0)                                        | 2 (40)                                   | 2 (29)                       | 0.25 <sup>3</sup> |
| Parity n (%)                                   |                                              |                                          |                              |                   |
| 0                                              | 1 (12.5)                                     | 2 (33.3)                                 | 1 (14.3)                     | 0.27 <sup>3</sup> |
| 1                                              | 1 (12.5)                                     | 2 (33.3)                                 | 4 (57.1)                     |                   |
| > 1                                            | 6 (75.0)                                     | 2 (33.3)                                 | 2 (28.6)                     |                   |
| FIGO classification                            |                                              |                                          |                              |                   |
| 1-2                                            | 1                                            | 3                                        | 2                            | 0.57 <sup>3</sup> |
| 3-5                                            | 6                                            | 3                                        | 4                            |                   |
| 6-7                                            | 0                                            | 0                                        | 0                            |                   |
| NA                                             | 1                                            | 0                                        | 1                            |                   |
| Myoma neighbouring to the analysed endometrium | 3                                            | 3                                        | 2                            | 0.73 <sup>3</sup> |
| Presence of focal PAEC                         | NA                                           | NA                                       | 2                            | NA                |

<sup>1</sup> Non-parametric Kruskal Wallis; <sup>2</sup> ANOVA test variance analysis.<sup>3</sup> Chi<sup>2</sup> test; IQR – interquartile range; CI95% – 95% confidence interval.

**Table S2.** Selection of the top ten statistically most significant biological processes potentially involved in the physiopathology of human endometrium.

| <b>Biological Processes</b>                                       |                                       | <b>-log(p-value)</b> | <b>mRNA Participating in the Selected Biological Processes and Regulated by Identified miRNA</b>                                                                 |
|-------------------------------------------------------------------|---------------------------------------|----------------------|------------------------------------------------------------------------------------------------------------------------------------------------------------------|
| Superficial layer<br>Different from proliferative<br>Up-regulated | Quantity of connective tissue cells   | 5.47                 | AKT2,NFATC2,SFRP4                                                                                                                                                |
|                                                                   | Cell death of connective tissue cells | 4.29                 | AKT2,NFATC2,SFRP4                                                                                                                                                |
|                                                                   | Migration of cancer cells             | 3.59                 | AKT2,NFATC2                                                                                                                                                      |
|                                                                   | Metastasis of tumour cell lines       | 3.32                 | AKT2,NFATC2                                                                                                                                                      |
|                                                                   | Remission of tumour                   | 3.09                 | AKT2                                                                                                                                                             |
|                                                                   | Transmigration of cancer cells        | 3.01                 | NFATC2                                                                                                                                                           |
|                                                                   | Apoptosis of fibroblast cell lines    | 3.00                 | AKT2,NFATC2                                                                                                                                                      |
|                                                                   | Binding of leukocytes                 | 2.93                 | AKT2,NFATC2                                                                                                                                                      |
|                                                                   | Migration of cells                    | 2.89                 | AKT2,NFATC2,SFRP4                                                                                                                                                |
|                                                                   | Binding of DNA                        | 2.85                 | AKT2,NFATC2                                                                                                                                                      |
| Down                                                              | Transcription of RNA                  | 21.22                | AHR,AHRR,AR,BCL6,BDNF,BTG3,CAV1,CCL2,CCND1,CDK2,CDK6,CEBPA,CREB1,CREB3L2,CTGF,DLL1,DLX2,E2F3,E2F5,E2F6,EGR1,ELF4,ELK3,ESR1,ETS1,FOXA2,GMCL1,GSK3B,HDAC1,HDAC4,HD |

|                                      |       |                                                                                                                                                                                                                                                                                                                                                                                                                                                                                                                                                                             |
|--------------------------------------|-------|-----------------------------------------------------------------------------------------------------------------------------------------------------------------------------------------------------------------------------------------------------------------------------------------------------------------------------------------------------------------------------------------------------------------------------------------------------------------------------------------------------------------------------------------------------------------------------|
|                                      |       | AC5,HES1,HOXA1,HOXA11,INPPL1,JAG1,KLF15,LDLR,MAP2K1,MAPK14,MDFIC,MED1,MET,MYB,MYC,MYCN,NEUROD1,NFATC1,NFIC,NOTCH1,NOTCH2,PHF19,PPP1R13L,PRKCE,PRKD1,PTBP1,PTEN,RARG,RELA,SIRT1,SMAD5,SNAI2,SOX9,SP1,STAT3,TEAD1,TOM1L1,TP53,TRIM29,TRIP11,TRPS1,TWIST2,UHRF1,WNT1,ZBED3,ZEB1,ZEB2                                                                                                                                                                                                                                                                                           |
| G1/S phase transition                | 20.50 | AHR,BCL2,CCND1,CDK2,CDK4,CDK6,CEBPA,E2F3,E2F5,ESR1,ITGB1,MAP2K1,MAPK14,MET,MYB,MYC,NFATC1,PTEN,PTK2,STAT3,TP53,VEGFA,WNT1,ZEB2                                                                                                                                                                                                                                                                                                                                                                                                                                              |
| Interphase                           | 20.32 | AHR,ARAF,BCL2,CAV1,CCND1,CDK2,CDK4,CDK6,CEBPA,E2F3,E2F5,E2F6,EGR1,ESR1,HDAC1,HDAC4,ITGB1,MAD2L2,MAP2K1,MAP3K8,MAPK14,MET,MYB,MYC,MYCN,NEK9,NFATC1,NOTCH1,PTEN,PTK2,RELA,SIRT1,SOX9,STAT3,TP53,UHRF1,VEGFA,WNT1,ZEB2                                                                                                                                                                                                                                                                                                                                                         |
| Transcription                        | 19.98 | AHR,AHRR,AR,BCL6,BDNF,BTG3,CAV1,CCL2,CCND1,CDK2,CDK6,CEBPA,CREB1,CREB3L2,CTGF,DLL1,DLX2,E2F3,E2F5,E2F6,EGR1,ELF4,ELK3,ERBB3,ESR1,ETS1,FOXA2,GAS2L1,GMCL1,GSK3B,HDAC1,HDAC4,HDAC5,HES1,HOXA1,HOXA11,INPPL1,JAG1,KLF15,LDLR,MAP2K1,MAPK14,MDFIC,MED1,MET,MYB,MYC,MYCN,NEUROD1,NFATC1,NFIC,NOTCH1,NOTCH2,PHF19,PPP1R13L,PRKCE,PRKD1,PTBP1,PTEN,RARG,RELA,SIRT1,SMAD5,SNAI2,SOX9,SP1,STAT3,TEAD1,TOM1L1,TP53,TRIM29,TRIP11,TRPS1,TWIST2,UHRF1,VEGFA,WNT1,ZBED3,ZEB1,ZEB2                                                                                                        |
| Differentiation of epithelial tissue | 19.65 | ABHD5,AR,BCL2,BLOC1S6,CAV1,CCND1,CEBPA,CTNND1,DLL1,FOX11R,FOXA2,HDAC1,HES1,ITGB1,JAG1,MAP2K1,MAPK14,MET,MYB,MYC,MYH9,NEUROD1,NFATC1,NOTCH1,NOTCH2,PLAU,PPP1R13L,PTEN,RDH10,RELA,SOX9,STAT3,TOM1L1,VEGFA,ZEB1,ZEB2                                                                                                                                                                                                                                                                                                                                                           |
| Apoptosis                            | 19.17 | AHR,AR,AXIN2,B4GALT1,BCL2,BCL6,BDNF,CAV1,CCL2,CCND1,CD164,CD47,CD59,CDK2,CDK4,CDK6,CEBPA,CERS2,CREB1,CREB3L2,CTGF,CYP1B1,DEPDC1,DFFB,DHCR24,DLL1,DLX2,DRAM1,E2F3,EGR1,ELF4,ERBB3,ESR1,ETS1,FOXA2,GMCL1,GSK3B,GSN,HDAC1,HDAC4,HDAC5,HEBP2,HES1,HOXA11,INPPL1,ITGB1,JAG1,LDLR,MAD2L2,MAN2A1,MAP2K1,MAP3K8,MAPK14,MCL1,MED1,MET,MTPN,MYB,MYC,MYCN,NEUROD1,NFATC1,NFIC,NOTCH1,NOTCH2,PGF,PLAU,PLP2,PLSCR3,PPP1R13L,PRKCE,PTEN,PTK2,RARG,RASSF5,RELA,SIRT1,SLC17A5,SMAD5,SNAI2,SOX9,SP1,STAT3,SWAP70,SYCP1,TEAD1,TJP2,TMEM109,TNFRSF21,TP53,TRIM29,TRPS1,VEGFA,WNT1,ZEB2,ZFP36L2 |
| Expression of RNA                    | 18.90 | AHR,AHRR,AR,BCL6,BDNF,BTG3,CAV1,CCL2,CCND1,CDK2,CDK6,CEBPA,CREB1,CREB3L2,CTGF,DLL1,DLX2,DNAJC1,E2F3,E2F5,E2F6,EGR1,ELF4,ELK3,ERBB3,ESR1,ETS1,FOXA2,GAS2L1,GMCL1,GSK3B,HDAC1,HDAC4,HDAC5,HES1,HOXA1,HOXA11,INPPL1,JAG1,KLF15,LDLR,MAP2K1,MAPK14,MDFIC,MED1,MET,MYB,MYC,MYCN,NEUROD1,NFATC1,NFIC,NOTCH1,NOTCH2,PHF19,PPP1R13L,PRKCE,PRKD1,PTBP1,PTEN,RARG,RELA,SIRT1,SMAD5,SNAI2,SOX9,SP1,STAT3,TEAD1,TOM1L1,TP53,TRIM29,TRIP11,TRPS1,TWIST2,UHRF1,VEGFA,WNT1,ZBED3,ZEB1,ZEB2                                                                                                 |
| Cell transformation                  | 18.86 | ARAF,ARHGEF1,BCL2,BCL6,CAV1,CCND1,CDK2,CDK4,CDK6,CEBPA,DFFB,EGR1,ERBB3,ESR1,ETS1,HES1,HTATIP2,ITGB1,MAP2K1,MAP3K8,MAPK14,MET,MYB,MYC,MYCN,NFATC1,NOTCH1,PPP1R13L,PRKCE,PTEN,PTK2,PTPN12,RELA,RHOG,SOX9,STAT3,TP53,                                                                                                                                                                                                                                                                                                                                                          |

|                          |                                      |       |                                                                                                                                                                                                                                                                                                                                                                                                                                   |
|--------------------------|--------------------------------------|-------|-----------------------------------------------------------------------------------------------------------------------------------------------------------------------------------------------------------------------------------------------------------------------------------------------------------------------------------------------------------------------------------------------------------------------------------|
| Different from secretory |                                      |       | VEGFA,WNT1                                                                                                                                                                                                                                                                                                                                                                                                                        |
|                          | Cell cycle progression               | 18.22 | AHR,ARAF,ARPC1B,B4GALT1,BCL2,BCL6,BTG3,CAV1,CCND1,CD59,CDK2,CDK4,CDK6,CEBPA,CREB1,DLX2,E2F3,E2F5,E2F6,EGR1,ERBB3,ESR1,ETS1,GAS2L1,GSK3B,HDAC1,ITGB1,MAD2L2,MAP2K1,MAPK14,MET,MYB,MYC,MYCN,NEK6,NEK9,NEUROD1,NFATC1,NOTCH1,PTEN,PTK2,RARG,RELA,SIRT1,STAT3,TP53,UHMK1,VEGFA,WNT1,ZEB1                                                                                                                                              |
|                          | Solid tumour                         | 17.61 | AHR,ALDH9A1,AR,ARAF,BCL2,BCL6,BDNF,BTG3,CAV1,CCL2,CCND1,CD47,CDCA7L,CDK2,CDK4,CDK6,CEBPA,CREB1,CTGF,CTNND1,CYP1B1,DLL1,DNM2,DVL2,E2F3,EGR1,ERBB3,ESR1,ETS1,FAM129B,FAM57A,GSK3B,HDAC1,HTATIP2,IQGAP1,ITGB1,MAP2K1,MAP3K8,MAPK14,MCL1,MET,MYB,MYC,MYCN,MYH9,NEUROD1,NFATC1,NOTCH1,NOTCH2,PGF,PGM1,PLAU,PPP1R13L,PRKCE,PTBP1,PTEN,PTK2,RASSF5,RELA,RHOG,SIRT1,SNAI2,STAT3,STX2,TLN1,TNFRSF21,TP53,TRIM29,UHRF1,VEGFA,WNT1,ZEB1,ZEB2 |
|                          | Endometrial cancer                   | 6.90  | BAP1,ERRFI1,PTEN                                                                                                                                                                                                                                                                                                                                                                                                                  |
|                          | Quantity of cells                    | 5.90  | AKT2,ERBIN,ERRFI1,NFATC2,PLCG1,PTEN,PTPN12,PTPN13,RERE,SFRP4,ZEB1,ZEB2                                                                                                                                                                                                                                                                                                                                                            |
|                          | Migration of cells                   | 5.80  | AKT2,ELMO2,ERRFI1,NFATC2,PLCG1,PTEN,PTPN12,RERE,SFRP4,ZEB1,ZEB2                                                                                                                                                                                                                                                                                                                                                                   |
|                          | Up-regulated                         |       |                                                                                                                                                                                                                                                                                                                                                                                                                                   |
|                          | Endometrial adenocarcinoma           | 5.48  | BAP1,PTEN                                                                                                                                                                                                                                                                                                                                                                                                                         |
|                          | Metastasis of cells                  | 4.80  | AKT2,NFATC2,PTEN,ZEB1,ZEB2                                                                                                                                                                                                                                                                                                                                                                                                        |
|                          | Hyperplasia of endometrium           | 4.51  | ERRFI1,PTEN                                                                                                                                                                                                                                                                                                                                                                                                                       |
|                          | Migration of cancer cells            | 4.50  | AKT2,NFATC2,PTEN,ZEB1                                                                                                                                                                                                                                                                                                                                                                                                             |
|                          | Solid tumour                         | 4.46  | AKT2,BAP1,ERBIN,ERRFI1,NFATC2,PTEN,PTPN13,ZEB1,ZEB2                                                                                                                                                                                                                                                                                                                                                                               |
|                          | Differentiation of epithelial tissue | 4.45  | ERBIN,ERRFI1,PTEN,ZEB1,ZEB2                                                                                                                                                                                                                                                                                                                                                                                                       |
|                          | Neoplasia of tumour cell lines       | 4.40  | AKT2,BAP1,NFATC2,PTEN,ZEB2                                                                                                                                                                                                                                                                                                                                                                                                        |
|                          | Down-regulated                       |       |                                                                                                                                                                                                                                                                                                                                                                                                                                   |
|                          | Solid tumour                         | 11.58 | ABL1,ANPEP,ATP2A2,BCL6,BECN1,CDCP1,CTGF,CXCL14,E2F3,F2,GALNT1,GNAI2,IDH1,IL11,ITGA2,JUN,MAP4K4,MBNL1,MET,MLLT1,MNT,NEUROD1,NPTX1,NT5E,PGM1,PTPN1,RAD52,RUNX2,SDHD,SLC7A11,SLC9A3R2,SMAD4,SOCS3,SRC,STX1A,TNRC6A,TP53,TP63,WNT5A                                                                                                                                                                                                   |
|                          | Malignant solid tumour               | 10.36 | ABL1,ANPEP,ATP2A2,BCL6,BECN1,CTGF,CXCL14,E2F3,F2,GNAI2,IL11,ITGA2,JUN,MAP4K4,MBNL1,MET,MLLT1,NEUROD1,NPTX1,NT5E,PGM1,PTPN1,RAD52,RUNX2,SLC7A11,SMAD4,SOCS3,SRC,TNRC6A,TP53,TP63,WNT5A                                                                                                                                                                                                                                             |
|                          | Cancer                               | 10.01 | ABL1,ANPEP,ATP2A2,BCL6,BECN1,CBFB,CDCP1,CTGF,CXCL14,E2F3,F2,GNAI2,HNRNPM,HOXA1,IL11,ISCU,ITGA2,JUN,MAP4K4,MBNL1,MET,MLLT1,NEUROD1,NPTX1,NT5E,PGM1,PNP,PTPN1,RAD52,RUNX2,SLC7A11,SMAD4,SOCS3,SRC,TNRC6A,TP53,TP63,UBE2I,WNT5A                                                                                                                                                                                                      |
|                          | Cell viability                       | 7.49  | ABL1,BCL6,BECN1,CBFB,CTGF,E2F3,EFNA3,IL11,JUN,MET,MNT,NEUROD1,PPP3CA,PTPN1,RAD52,RUNX2,SMAD4,SOCS3,SRC,STX1A,TP53,TP63,WNT5A                                                                                                                                                                                                                                                                                                      |
|                          | Tumorigenesis of malignant tumour    | 7.28  | ABL1,BCL6,BECN1,GNAI2,JUN,MBNL1,MET,NEUROD1,RUNX2,SLC7A11,SMAD4,SOCS3,TNRC6A,TP53,TP63,WNT5A                                                                                                                                                                                                                                                                                                                                      |

|                                                               |                                          |       |                                                                                                                                                                                                                                                                                                                                                                                                                                                                                                                                                                            |
|---------------------------------------------------------------|------------------------------------------|-------|----------------------------------------------------------------------------------------------------------------------------------------------------------------------------------------------------------------------------------------------------------------------------------------------------------------------------------------------------------------------------------------------------------------------------------------------------------------------------------------------------------------------------------------------------------------------------|
| Basal layer<br>Different from proliferative<br>Down-regulated | Apoptosis                                | 7.17  | ABL1,ANPEP,API5,ATRX,BCL6,BECN1,CASP8AP2,CBFB,CDCP1,CTGF,E2F3,F2,FGFRL1,GNAI2,IL11,JUN,MAP4K4,MET,MNT,NCEH1,NCL,NEUROD1,PAFAH1B2,PEX11B,PNP,PPP3CA,PTPN1,RUNX2,SLC4A7,SLC7A11,SMAD4,SOCS3,SRC,STX1A,TNFAIP2,TNRC6A,TP53,TP63,TRPS1,UBE2I,WNT5A                                                                                                                                                                                                                                                                                                                             |
|                                                               | Connective tissue tumour                 | 6.76  | ABL1,BECN1,IDH1,JUN,MAP4K4,MET,MLLT1,NT5E,RUNX2,SLC7A11,TP53,TP63                                                                                                                                                                                                                                                                                                                                                                                                                                                                                                          |
|                                                               | Differentiation of tumour cell lines     | 6.52  | ABL1,ACVR1,BCL6,CNOT9,IL11,JUN,NEUROD1,SMAD4,SOCS3,TP53                                                                                                                                                                                                                                                                                                                                                                                                                                                                                                                    |
|                                                               | Proliferation of connective tissue cells | 6.46  | ABL1,CTGF,F2,GNAI2,IDH1,JUN,MET,NPR3,PTPN1,RUNX2,SLC7A11,SMAD4,SOCS3,SRC,TP53,TP63,TRPS1,WNT5A                                                                                                                                                                                                                                                                                                                                                                                                                                                                             |
|                                                               | Connective tissue cancer                 | 6.39  | JUN,MET,NT5E,RUNX2,TP53,TP63                                                                                                                                                                                                                                                                                                                                                                                                                                                                                                                                               |
|                                                               | Interphase                               | 26.35 | AHR,ARAF,BCL2,CAV1,CCND1,CCND3,CCNE1,CDC25A,CDK2,CDK4,CDK6,CEBPA,CENPJ,CHEK1,DMTF1,E2F3,E2F5,EGR1,EIF4E,FGF2,FLT3,GRB10,GRB2,HDAC1,HDAC4,IGF1,IGF1R,ITGB1,JUN,KITLG,MAD2L2,MAP2K1,MAPK14,MAPK3,MET,MSH2,MYB,MYC,MYCN,NEK9,NFATC1,NOTCH1,PTEN,PTGS2,PURA,RAF1,RELA,SIRT1,SOX9,SPI1,STAT3,TP53,UHRF1,VEGFA,WNT1,ZEB2                                                                                                                                                                                                                                                         |
|                                                               | Cell transformation                      | 25.93 | ARAF,ARHGEF1,BCL2,CAV1,CCND1,CCND3,CCNE1,CDC25A,CDK2,CDK4,CDK6,CEBPA,DFFB,DMTF1,EGFR,EGR1,EIF4E,ERBB3,F2,FGF2,FGFR1,FLT3,GOLGA5,GRB10,GRB2,HES1,HMGA1,HTATIP2,IGF1,IGF1R,ITGB1,JUN,MAP2K1,MAP2K4,MAPK14,MET,MLLT1,MYB,MYC,MYCN,NFATC1,NOTCH1,ODC1,PDCD4,PISD,PPP1R13L,PRKCE,PTEN,PTPN12,RAF1,RELA,RHOG,SOX9,STAT3,TP53,TPM3,VEGFA,WNT1                                                                                                                                                                                                                                     |
|                                                               | Cell cycle progression                   | 25.59 | AHR,ARAF,ARPC1B,B4GALT1,BCL2,BTG3,CAV1,CCND1,CCND3,CCNE1,CCNF,CD59,CDC25A,CDK2,CDK4,CDK6,CEBPA,CENPJ,CHEK1,CREB1,DLX2,DMTF1,E2F3,E2F5,EGFR,EGR1,ERBB3,F2,FGF2,FGF7,FGFR1,GAS2L1,GRB10,GRB2,GSK3B,GTTF2H1,HDAC1,IGF1,IGF1R,ITGB1,JUN,KITLG,MAD2L2,MAP2K1,MAP2K4,MAPK14,MAPK3,MET,MSH2,MYB,MYC,MYCN,NEK6,NEK9,NEUROD1,NFATC1,NOTCH1,PLAG1,PLK1,PRIMPOL,PTEN,PTGS2,PURA,RAF1,RARG,RELA,SIRT1,STAT3,TP53,UBE2S,UHMK1,VEGFA,WEE1,WNT1,WNT3A,ZEB1                                                                                                                                |
|                                                               | Malignant solid tumour                   | 25.51 | AHR,ALDH9A1,ARHGDIA,ASXL2,BCL2,BTG3,CAV1,CCL2,CCND1,CCND3,CD47,CDCA7L,CDK2,CDK4,CDK6,CEBPA,CHEK1,CREB1,CTGF,CTNND1,CYP1B1,DMTF1,E2F3,EGFR,EGR1,ERBB3,F2,FGF2,FGF7,FGFR1,FNDC3B,GRB2,HACE1,HDAC1,HMGA1,HMOX1,HSP90B1,HTATIP2,IGF1,IGF1R,IQGAP1,ITGA2,ITGB1,JUN,KITLG,LAMTOR5,MAP2K1,MAPK14,MCL1,MET,MLLT1,MSH2,MYB,MYC,MYCN,MYH9,NEUROD1,NFATC1,NFIA,NOTCH1,NOTCH2,ODC1,PDCD4,PGF,PGM1,PLK1,PRKCE,PTBP1,PTEN,PTGS2,RAD51C,RAF1,RASSF5,RECK,RELA,RHOG,SIRT1,SKAP2,SNAI2,SPI1,SQSTM1,STAT3,STX2,TLN1,TNFRSF21,TP53,TPI1,TRIM29,TUSC2,UHRF1,VEGFA,WNT1,WNT3A,WT1,ZEB1,ZEB2,ZYX |
|                                                               | Solid tumour                             | 24.46 | AHR,ALDH9A1,ARAF,ARHGDIA,ASXL2,BCL2,BDNF,BTG3,CAV1,CCL2,CCND1,CCND3,CCNE1,CD47,CDC25A,CDCA7L,CDK2,CDK4,CDK6,CEBPA,CHEK1,CREB1,CSHL1,CTGF,CTNND1,CYP1B1,DLL1,DMTF1,DNM2,DVL2,E2F3,EGFR,EGR1,EIF4E,ERBB3,F2,FAM129B,FAM57A,FGF2,FGF7,FGFR1,FNDC3B,GRB2,GSK3B,HACE1,HDAC1,                                                                                                                                                                                                                                                                                                    |

|                                        |       |                                                                                                                                                                                                                                                                                                                                                                                                                                                                                                                                                                                                                                                                                                                                                                                                                                               |
|----------------------------------------|-------|-----------------------------------------------------------------------------------------------------------------------------------------------------------------------------------------------------------------------------------------------------------------------------------------------------------------------------------------------------------------------------------------------------------------------------------------------------------------------------------------------------------------------------------------------------------------------------------------------------------------------------------------------------------------------------------------------------------------------------------------------------------------------------------------------------------------------------------------------|
|                                        |       | HMGA1,HMOX1,HSP90B1,HTATIP2,IGF1,IGF1R,IQGAP1,ITGA2,ITGB1,JUN,KITLG,LAMTOR5,MAP2K1,MAP2K4,MAPK14,MCL1,MET,MLLT1,MSH2,MYB,MYC,MYCN,MYH9,NEUROD1,NFATC1,NFIA,NOTCH1,NOTCH2,ODC1,PDCD4,PGF,PGM1,PISD,PLK1,PPP1R13L,PRKCE,PTBP1,PTEN,PTGS2,RAD51C,RAF1,RASSF5,RECK,RELA,RHOG,SIRT1,SKAP2,SNAI2,SPI1,SQSTM1,STAT3,STX2,TLN1,TNFRSF21,TP53,TPI1,TRIM29,TUSC2,UHRF1,VEGFA,WNT1,WNT3A,WT1,ZEB1,ZEB2,ZYX                                                                                                                                                                                                                                                                                                                                                                                                                                               |
| Apoptosis                              | 22.41 | AHR,ATF6,AXIN2,B4GALT1,BCL2,BCL2L2,BDNF,CADM1,CAPRIN1,CAV1,CCL2,CCND1,CCND3,CCNE1,CD164,CD47,CD59,CDC25A,CDK2,CDK4,CDK6,CEBPA,CENPJ,CERS2,CHEK1,CREB1,CREB3L2,CREBL2,CTGF,CYP1B1,DEPDC1,DFFB,DHCR24,DLL1,DLX2,DRAM1,E2F3,EGFR,EGR1,EIF4E,ELF4,ERBB3,F2,FGF2,FGFR1,FLT3,FOXA2,GFPT1,GMCL1,GPAM,GRB10,GSK3B,GSN,HDAC1,HDAC4,HDAC5,HEBP2,HES1,HMGA1,HMOX1,IGF1,IGF1R,IGF2R,INPPL1,ITGB1,JAG1,JUN,KITLG,LDLR,MAD2L2,MAN2A1,MAP2K1,MAP2K4,MAPK14,MAPK3,MCL1,MED1,MET,MSH2,MTPN,MYB,MYC,MYCN,NEUROD1,NFATC1,NFIC,NOTCH1,NOTCH2,ODC1,OGT,OMA1,PAFAH1B2,PANX1,PDCD4,PDCD6IP,PGF,PLK1,PLP2,PLSCR3,PNP,PPP1R13L,PRKCE,PTEN,PTGS2,RAF1,RARG,RASSF5,RELA,RNASEL,RTN4,SERPINE2,SIRT1,SLC17A5,SMAD5,SNAI2,SOX9,SP1,SPI1,SQSTM1,STAT3,SWAP70,SYCP1,TEAD1,TIA1,TJP2,TMEM109,TNFRSF21,TP53,TRIM29,TRPS1,TXN2,UCP2,VEGFA,VTI1B,WEE1,WNT1,WNT3A,WT1,ZEB2,ZFP36L2 |
| Tumorigenesis of tissue                | 22.29 | AHR,ARAF,BCL2,BDNF,CAV1,CCL2,CCND1,CCND3,CCNE1,CDK2,CDK4,CDK6,CEBPA,CHORDC1,CREB1,CSHL1,CTGF,CTNND1,DLX1,E2F3,EGFR,EGR1,ERBB3,FAM57A,FGF2,FGF7,FGFR1,FLT3,GRB2,GSK3B,HMGA1,HMOX1,HTATIP2,IGF1,IGF1R,IQGAP1,ITGA2,ITGB1,JUN,LAMTOR5,MAP2K1,MAP2K4,MET,MSH2,MYC,MYCN,NFATC1,NOTCH1,NOTCH2,ODC1,PDCD4,PGF,PISD,PLK1,PRKCE,PTEN,PTGS2,RAD51C,RAF1,RASSF5,RECK,RELA,RHOG,SIRT1,SNAI2,SPI1,STAT3,STX2,TP53,TPI1,TRIM29,TUSC2,VEGFA,WNT1,WNT3A,WT1                                                                                                                                                                                                                                                                                                                                                                                                   |
| Proliferation of fibroblast cell lines | 21.87 | AHR,ARHGEF1,ATG9A,BTG3,CAPRIN1,CAV1,CCND1,CDC14B,CDK4,CDK6,CEBPA,CREB1,DMTF1,E2F3,EGFR,EGR1,EIF4E,ERBB3,F2,FGF2,GRB2,HMGA1,IGF1,IGF1R,ITGB1,JAG1,JUN,LDLRAP1,MAD2L2,MAPK14,MAPK3,MET,MYC,NFATC1,NOTCH1,ODC1,PLAG1,PIF,PRKCE,PTEN,RAF1,RASSF5,RECK,RELA,RNASEL,RYK,SIRT1,SOX9,STAT3,SWAP70,TP53,TPM3,WNT3A,WT1                                                                                                                                                                                                                                                                                                                                                                                                                                                                                                                                 |
| Cell survival                          | 21.62 | AHR,BCL2,BCL2L2,BDNF,CADM1,CAV1,CCL2,CD47,CD59,CDCA7L,CDK4,CHEK1,CREB1,CTGF,DLX2,E2F3,EGFR,EGR1,EIF4E,ELF4,ERBB3,FGF2,FGF7,FGFR1,FLT3,GRB10,GRB2,GSK3B,HDAC1,HDAC5,HES1,HMGA1,HMOX1,IGF1,IGF1R,IQGAP1,ITGB1,JAG1,JUN,KITLG,MAD2L2,MAP2K1,MAP2K4,MAPK14,MAPK3,MCL1,MET,MSH2,MYB,MYC,MYCN,NEUROD1,NOTCH1,NOTCH2,ODC1,OGT,PDCD4,PGF,PLK1,PPP1R13L,PRKCE,PRKD1,PTEN,PTGS2,RAD51C,RAF1,RARG,RELA,RNASEL,SIRT1,SNAI2,SOX9,STAT3,TP53,UCP2,UHRF1,VEGFA,WIPF1,WNT1,WT1,ZEB1,ZEB2                                                                                                                                                                                                                                                                                                                                                                      |
| Cancer                                 | 21.30 | AHR,ALDH9A1,ARHGDIA,ASXL2,BCL2,BTG3,CAV1,CCL2,CCND1,CCND3,CD47,CD59,CDC25A,CDCA7L,CDK2,CDK4,CDK6,CEBPA,CHEK1,CREB1,CSHL1,CTGF,CTNND1,CYP1B1,DFFB,DLX2,DMTF1,                                                                                                                                                                                                                                                                                                                                                                                                                                                                                                                                                                                                                                                                                  |

|                          |                                          |       |                                                                                                                                                                                                                                                                                                                                                                                                                                                                                                                  |
|--------------------------|------------------------------------------|-------|------------------------------------------------------------------------------------------------------------------------------------------------------------------------------------------------------------------------------------------------------------------------------------------------------------------------------------------------------------------------------------------------------------------------------------------------------------------------------------------------------------------|
|                          |                                          |       | E2F3,EGFR,EGR1,ERBB3,F2,FGF2,FGF7,FGFR1,FLT3,FNDC3B,FOXA2,GRB2,GSK3B,GSN,HACE1,HDAC1,HES1,HMGA1,HMOX1,HSP90B1,HTATIP2,IGF1,IGF1R,IGF2R,IQGAP1,ITGA2,ITGB1,JUN,KITLG,LAMTOR5,LITAF,MAD2L2,MAP2K1,MAP2K4,MAPK14,MCL1,MET,MLLT1,MSH2,MYB,MYC,MYCN,MYH9,NEUROD1,NFATC1,NFIA,NOTCH1,NOTCH2,ODC1,PDCD4,PGF,PGM1,PLK1,PNP,PPP1R13L,PRKCE,PTBP1,PTEN,PTGS2,RAD51C,RAF1,RARG,RASSF5,RECK,RELA,RHOG,SIRT1,SKAP2,SNAI2,SPI1,SQSTM1,STAT3,STX2,TLN1,TNFRSF21,TP53,TPI1,TRIM29,TUSC2,UHRF1,VEGFA,WNT1,WNT3A,WT1,ZEB1,ZEB2,ZYX |
| Up-regulated             | Expression of RNA                        | 5.67  | AR,HOXA7,HOXB8,HOXC8,HOXD8,IKBKB,LCOR,S100A9                                                                                                                                                                                                                                                                                                                                                                                                                                                                     |
|                          | Transcription of RNA                     | 4.96  | AR,HOXA7,HOXB8,HOXC8,HOXD8,IKBKB,LCOR                                                                                                                                                                                                                                                                                                                                                                                                                                                                            |
|                          | Activation of DNA endogenous promoter    | 4.90  | AR,HOXA7,HOXB8,HOXC8,HOXD8,LCOR                                                                                                                                                                                                                                                                                                                                                                                                                                                                                  |
|                          | Regeneration of epithelial tissue        | 4.48  | AR,IKBKB                                                                                                                                                                                                                                                                                                                                                                                                                                                                                                         |
|                          | Cell death of cancer cells               | 4.35  | ANXA1,AR,HOXA7,IKBKB                                                                                                                                                                                                                                                                                                                                                                                                                                                                                             |
|                          | Fibrosis of secretory structure          | 4.32  | AR,IKBKB                                                                                                                                                                                                                                                                                                                                                                                                                                                                                                         |
|                          | Migration of tumour cell lines           | 4.10  | ANXA1,IKBKB,S100A9                                                                                                                                                                                                                                                                                                                                                                                                                                                                                               |
|                          | Morphology of tumour                     | 3.86  | ANXA1,AR,IKBKB                                                                                                                                                                                                                                                                                                                                                                                                                                                                                                   |
|                          | Chemotaxis                               | 3.83  | ANXA1,HOXA7,IKBKB,S100A9                                                                                                                                                                                                                                                                                                                                                                                                                                                                                         |
|                          | Growth of tumour                         | 3.64  | ANXA1,AR,HOXA7,IKBKB,S100A9                                                                                                                                                                                                                                                                                                                                                                                                                                                                                      |
| Different from secretory | Inflammation of organ                    | 17.98 | ABL1,BLMH,CAMP,CD1D,CD40,CFH,CHUK,CRP,DMBT1,E2F3,IFNB1,IL10,IL11,IL12RB2,IL1R1,IL36RN,IRAK1,IRF5,LBP,LTB,MNT,MR1,NOS2,PGLYRP1,PGLYRP2,PTAFR,PTPN1,SFTPD,SMAD4,SOCS3,STAT1,TLR4,TLR9,TP63,TRAF6                                                                                                                                                                                                                                                                                                                   |
|                          | Quantity of leukocytes                   | 16.65 | ABL1,CAMP,CCR3,CD1D,CD40,CFH,CHUK,CRP,CXCL14,CXCR4,FADD,IFNB1,IL10,IL11,IL12RB2,IL1R1,IL36A,IL36RN,IRAK1,IRF5,LTB,MNT,MR1,NOS2,PGLYRP1,PTAFR,RAD52,RUNX2,SFTPD,SOCS3,STAT1,TLR4,TLR9,TRAF6                                                                                                                                                                                                                                                                                                                       |
|                          | Inflammatory response                    | 15.93 | CAMP,CCR3,CD1D,CD40,CFH,CHUK,CRP,CXCR4,IFNB1,IL10,IL11,IL1R1,IL1RL2,IL36A,IRAK1,LBP,LTB,MCPH1,NOS2,PGLYRP1,PGLYRP2,PTAFR,SFTPD,SOCS3,STAT1,TLR1,TLR4,TLR9                                                                                                                                                                                                                                                                                                                                                        |
| Down-regulated           | Quantity of mononuclear leukocytes       | 15.75 | ABL1,CAMP,CCR3,CD1D,CD40,CHUK,CRP,CXCL14,CXCR4,FADD,IFNB1,IL10,IL11,IL12RB2,IL1R1,IL36A,IRAK1,IRF5,LTB,MNT,MR1,NOS2,PGLYRP1,PTAFR,RUNX2,SFTPD,SOCS3,STAT1,TLR4,TLR9,TRAF6                                                                                                                                                                                                                                                                                                                                        |
|                          | T cell development                       | 15.53 | ABL1,BRCA1,CD1D,CD40,CHUK,CRP,CXCR4,FADD,IFNB1,IL10,IL12RB2,IL1R1,IL1RL2,IL36B,IRAK1,IRF5,LTB,MNT,PGLYRP2,RAD52,RUNX2,SOCS3,STAT1,TLR4,TP63,TRAF6                                                                                                                                                                                                                                                                                                                                                                |
|                          | Haematopoiesis of mononuclear leukocytes | 15.49 | ABL1,BRCA1,CAMP,CD1D,CD40,CHUK,CRP,CXCR4,FADD,IFNB1,IL10,IL11,IL12RB2,IL1R1,IL1RL2,IL36B,IRAK1,IRF5,LTB,MNT,PGLYRP2,RAD52,RUNX2,SOCS3,STAT1,TLR4,TLR9,TP63,TRAF6                                                                                                                                                                                                                                                                                                                                                 |
|                          | Quantity of cells                        | 15.42 | ABL1,BRCA1,CAMP,CCR3,CD1D,CD40,CFH,CHUK,CRP,CXCL14,CXCR4,DMBT1,EFNA3,FADD,FGFRL1,HOXA1,IFNB1,IL10,IL11,IL12RB2,IL1R1,IL1RAP,IL36A,IL36RN,IRAK1,IRF5,LTB,MCPH1,MNT,MR1,NLGN1,NOS2,PGLYRP1,PTAFR,RAD52,RUNX2,SFTPD,SMAD4,SOCS3,STAT1,TLR4,TLR9,TP63,TRAF6                                                                                                                                                                                                                                                          |

|                           |       |                                                                                                                                                                         |
|---------------------------|-------|-------------------------------------------------------------------------------------------------------------------------------------------------------------------------|
| Activation of cells       | 14.99 | CAMP,CD1D,CD40,CFH,CHUK,CRP,CXCR4,FADD,IFNB1,IL10,IL11,IL12RB2,IL1R1,IL36A,IL36B,IL36G,IL36RN,IRAK1,IRF5,LBP,LTF,MR1,NOS2,PGLYRP2,RUNX2,SMAD4,SRC,STAT1,TLR4,TLR9,TRAF6 |
| Quantity of T lymphocytes | 14.84 | ABL1,CAMP,CD1D,CD40,CHUK,CRP,CXCL14,CXCR4,FADD,IFNB1,IL10,IL12RB2,IL1R1,IRAK1,LTB,MNT,MR1,NOS2,PGLYRP1,PTAFR,RUNX2,SOCS3,STAT1,TLR4,TLR9,TRAF6                          |
| Quantity of lymphocytes   | 14.36 | ABL1,CAMP,CD1D,CD40,CHUK,CRP,CXCL14,CXCR4,FADD,IFNB1,IL10,IL11,IL12RB2,IL1R1,IL36A,IRAK1,IRF5,LTB,MNT,MR1,NOS2,PGLYRP1,PTAFR,RUNX2,SOCS3,STAT1,TLR4,TLR9,TRAF6          |

The first three columns specify endometrial layers and expression of identified miRNA in the UPA group as compared to proliferative and secretory phase groups. The next three columns specify the biological processes identified using IPA in which mRNAs regulated by the identified miRNA participate.

**Table S3.** Selection of top ten canonical pathways regulated by the miRNA identified in Table1.

| Canonical Pathway IPA                |                                                                                | -log(p-value) | mRNA Participating in the Selected Canonical Pathways and Regulated by Identified miRNA                                                       |
|--------------------------------------|--------------------------------------------------------------------------------|---------------|-----------------------------------------------------------------------------------------------------------------------------------------------|
| Up-regulated                         | Role of Osteoblasts, Osteoclasts and Chondrocytes in Rheumatoid Arthritis      | 5.75          | SFRP4,AKT2,NFATC2                                                                                                                             |
|                                      | Role of Macrophages, Fibroblasts and Endothelial Cells in Rheumatoid Arthritis | 5.37          | SFRP4,AKT2,NFATC2                                                                                                                             |
|                                      | IL-4 Signalling                                                                | 4.23          | AKT2,NFATC2                                                                                                                                   |
|                                      | RANK Signalling in Osteoclasts                                                 | 4.07          | AKT2,NFATC2                                                                                                                                   |
|                                      | iCOS-iCOSL Signalling in T Helper Cells                                        | 3.94          | AKT2,NFATC2                                                                                                                                   |
|                                      | CD28 Signalling in T Helper Cells                                              | 3.88          | AKT2,NFATC2                                                                                                                                   |
|                                      | PI3K Signalling in B Lymphocytes                                               | 3.85          | AKT2,NFATC2                                                                                                                                   |
|                                      | Gαq Signalling                                                                 | 3.67          | AKT2,NFATC2                                                                                                                                   |
|                                      | Wnt/β-catenin Signalling                                                       | 3.62          | SFRP4,AKT2                                                                                                                                    |
|                                      | Role of NFAT in Regulation of the Immune Response                              | 3.58          | AKT2,NFATC2                                                                                                                                   |
| Down-regulated                       | Cell Cycle: G1/S Checkpoint Regulation                                         | 11.5          | MYC,TP53,E2F6,HDAC4,HDAC1,CDK6,CDK4,E2F5,GSK3B,E2F3,CCND1,CDK2,HDAC5                                                                          |
|                                      | Aryl Hydrocarbon Receptor Signalling                                           | 11.3          | TP53,TRIP11,RELA,NFIC,MED1,CDK6,CDK4,RARG,CCND1,CYP1B1,ALDH9A1,AHRR,MYC,SP1,ESR1,CDK2,AHR                                                     |
|                                      | Molecular Mechanisms of Cancer                                                 | 9.77          | RELA,CDK4,ARHGEF1,SMAD5,E2F3,CCND1,BCL2,PTK2,MYC,E2F6,RHOG,E2F5,PRKCE,GSK3B,MAP2K1,PRKD1,ITGB1,TP53,CDK6,GNAI3,MAPK14,NOTCH1,CDK2,WNT1,CTNND1 |
|                                      | p53 Signalling                                                                 | 9.56          | TP53,SNAI2,MED1,HDAC1,CDK4,CCND1,PTEN,BCL2,MAPK14,SIRT1,GSK3B,TRIM29,CDK2,DRAM1                                                               |
|                                      | Cyclins and Cell Cycle Regulation                                              | 9.17          | TP53,E2F6,HDAC4,HDAC1,CDK6,CDK4,E2F5,GSK3B,E2F3,CCND1,CDK2,HDAC5                                                                              |
|                                      | Pancreatic Adenocarcinoma Signalling                                           | 8.99          | TP53,RELA,CDK4,STAT3,E2F3,CCND1,BCL2,PGF,VEGFA,E2F6,E2F5,NOTCH1,MAP2K1,CDK2                                                                   |
|                                      | Regulation of the Epithelial-Mesenchymal Transition Pathway                    | 8.93          | ETS1,RELA,TWIST2,SNAI2,EGR1,ZEB1,STAT3,MET,DVL2,NOTCH2,ARAF,ZEB2,GSK3B,JAG1,NOTCH1,MAP2K1,WNT1                                                |
|                                      | Estrogen-mediated S-phase Entry                                                | 8.8           | MYC,E2F6,CDK4,E2F5,E2F3,ESR1,CCND1,CDK2                                                                                                       |
| Chronic Myeloid Leukaemia Signalling |                                                                                | 8.62          | MYC,TP53,RELA,E2F6,HDAC4,HDAC1,CDK6,CDK4,E2F5,                                                                                                |

Superficial layer  
Different from proliferative

|                          |                |                                                                           |       |                                                                                                                                                                                                                              |
|--------------------------|----------------|---------------------------------------------------------------------------|-------|------------------------------------------------------------------------------------------------------------------------------------------------------------------------------------------------------------------------------|
| Different from secretory | Up-regulated   |                                                                           |       | E2F3,CCND1,MAP2K1,HDAC5                                                                                                                                                                                                      |
|                          |                | HGF Signalling                                                            | 8.27  | ETS1,ITGB1,STAT3,CCND1,PTK2,MET,ELF4,PRKCE,MAP3K8,MAP2K1,ELK3,CDK2,PRKD1                                                                                                                                                     |
|                          |                | Neuregulin Signalling                                                     | 7.56  | AKT2,ERBIN,PLCG1,ERRFI1,PTEN                                                                                                                                                                                                 |
|                          |                | D-myo-inositol-5-phosphate Metabolism                                     | 6.28  | PTPN13,PLCG1,PPM1F,PTPN12,PTEN                                                                                                                                                                                               |
|                          |                | Superpathway of Inositol Phosphate Compounds                              | 5.46  | PTPN13,PLCG1,PPM1F,PTPN12,PTEN                                                                                                                                                                                               |
|                          |                | iCOS-iCOSL Signalling in T Helper Cells                                   | 5.19  | AKT2,PLCG1,NFATC2,PTEN                                                                                                                                                                                                       |
|                          |                | PI3K Signalling in B Lymphocytes                                          | 5.02  | AKT2,PLCG1,NFATC2,PTEN                                                                                                                                                                                                       |
|                          |                | D-myo-inositol (1,4,5,6)-Tetrakisphosphate Biosynthesis                   | 4.91  | PTPN13,PPM1F,PTPN12,PTEN                                                                                                                                                                                                     |
|                          |                | D-myo-inositol (3,4,5,6)-tetrakisphosphate Biosynthesis                   | 4.91  | PTPN13,PPM1F,PTPN12,PTEN                                                                                                                                                                                                     |
|                          |                | 3-phosphoinositide Degradation                                            | 4.74  | PTPN13,PPM1F,PTPN12,PTEN                                                                                                                                                                                                     |
|                          | Down-regulated | Protein Kinase A Signalling                                               | 4.39  | PTPN13,PLCG1,NFATC2,PTPN12,PTEN                                                                                                                                                                                              |
|                          |                | 3-phosphoinositide Biosynthesis                                           | 4.32  | PTPN13,PPM1F,PTPN12,PTEN                                                                                                                                                                                                     |
|                          |                | Role of Osteoblasts, Osteoclasts and Chondrocytes in Rheumatoid Arthritis | 4.73  | SRC,JUN,RUNX2,PPP3R1,ITGA2,SMAD4,PPP3CA,WNT5A,IL11                                                                                                                                                                           |
|                          |                | Guanosine Nucleotides Degradation III                                     | 4.24  | NT5C3A,NT5E,PNP                                                                                                                                                                                                              |
|                          |                | Urate Biosynthesis/Inosine 5'-phosphate Degradation                       | 4.13  | NT5C3A,NT5E,PNP                                                                                                                                                                                                              |
|                          |                | DNA Double-Strand Break Repair by Homologous Recombination                | 4.02  | ATRX,RAD52,ABL1                                                                                                                                                                                                              |
|                          |                | Adenosine Nucleotides Degradation II                                      | 4.02  | NT5C3A,NT5E,PNP                                                                                                                                                                                                              |
|                          |                | Wnt/ $\beta$ -catenin Signalling                                          | 3.92  | TP53,SRC,JUN,PTPA,ACVR1,ACVR1B,WNT5A                                                                                                                                                                                         |
|                          |                | Purine Nucleotides Degradation II (Aerobic)                               | 3.76  | NT5C3A,NT5E,PNP                                                                                                                                                                                                              |
|                          |                | Clathrin-mediated Endocytosis Signalling                                  | 3.63  | MET,SRC,AP2M1,AP2A1,PPP3R1,F2,PPP3CA                                                                                                                                                                                         |
| Basal layer              | Down-regulated | TGF- $\beta$ Signalling                                                   | 3.62  | JUN,RUNX2,ACVR1,SMAD4,ACVR1B                                                                                                                                                                                                 |
|                          |                | Virus Entry via Endocytic Pathways                                        | 3.35  | SRC,AP2M1,AP2A1,ITGA2,ABL1                                                                                                                                                                                                   |
|                          |                | Aryl Hydrocarbon Receptor Signalling                                      | 14.50 | TP53,TRIP11,RELA,NFIC,MED1,CDK6,CDK4,RARG,CCND1,CYP1B1,ALDH9A1,CHEK1,MYC,AHRR,CCNE1,HSP90B1,JUN,SP1,CCND3,MAPK3,NFIA,GSTM4,AHR,CDK2                                                                                          |
|                          |                | Pancreatic Adenocarcinoma Signalling                                      | 13.70 | MAP2K4,TP53,RELA,RAF1,GRB2,FGFR1,CDK4,STAT3,E2F3,CCND1,BCL2,PGF,VEGFA,HMOX1,CCNE1,MAPK3,E2F5,PTGS2,NOTCH1,MAP2K1,CDK2,EGFR                                                                                                   |
|                          |                | Molecular Mechanisms of Cancer                                            | 13.70 | MAP2K4,RELA,RAF1,CDK4,ARHGEF1,SMAD5,E2F3,CCND1,CHEK1,BCL2,MYC,LAMTOR3,RHOA,JUN,CCND3,SUFU,RHOT1,MAPK3,E2F5,PRKCE,GSK3B,MAP2K1,PRKD1,CDK25A,ITGB1,TP53,GRB2,FGFR1,ITGA2,CDK6,GNAI3,CCNE1,MAPK14,WNT3A,NOTCH1,WNT1,CDK2,CTNND1 |
|                          |                | p53 Signalling                                                            | 12.50 | TP53,WT1,SNAI2,GRB2,MED1,FGFR1,HDAC1,CDK4,CCND1,CHEK1,BCL2,PTEN,SERPINE2,JUN,MAPK14,SIRT1,GSK3B,TRIM29,CDK2,DRAM1                                                                                                            |
| Basal layer              | Down-regulated | Regulation of the Epithelial-Mesenchymal Transition Pathway               | 12.00 | MAP2K4,RELA,RAF1,TWIST2,SNAI2,FGF2,GRB2,EGR1,FGFR1,ZEB1,STAT3,MET,NOTCH2,DVL2,WNT3A,ARAF,MAPK3,ZEB2,GSK3B,JAG1,FGF7,NOTCH1,MAP2K1,WNT1,EG                                                                                    |



|                          |                                                                                |       | FR                                                                                                                                      |
|--------------------------|--------------------------------------------------------------------------------|-------|-----------------------------------------------------------------------------------------------------------------------------------------|
| Up-regulated             | Glioblastoma Multiforme Signalling                                             | 11.80 | TP53,RAF1,GRB2,FGFR1,CDK6,CDK4,E2F3,CCND1,PTEN,MYC,CCNE1,WNT3A,RHOG,IGF1,RHOT1,MAPK3,IGF1R,E2F5,GSK3B,MAP2K1,CDK2,WNT1,EGFR             |
|                          | Cell Cycle: G1/S Checkpoint Regulation                                         | 11.10 | TP53,HDAC4,HDAC1,CDK6,CDK4,E2F3,CCND1,HDAC5,MYC,CCNE1,CCND3,E2F5,GSK3B,CDK2,CDC25A                                                      |
|                          | IL-8 Signalling                                                                | 11.00 | MAP2K4,RELA,RAF1,GRB2,FGFR1,IQGAP1,CCND1,BCL2,GNG10,PGF,VEGFA,HMOX1,GNAI3,RHOG,JUN,ARAF,CCND3,RHOT1,MAPK3,PRKCE,PTGS2,MAP2K1,PRKD1,EGFR |
|                          | Cyclins and Cell Cycle Regulation                                              | 10.90 | TP53,RAF1,HDAC4,WEE1,HDAC1,CDK6,CDK4,E2F3,CCND1,HDAC5,CCNE1,CCND3,E2F5,GSK3B,CDK2,CDC25A                                                |
|                          | HGF Signalling                                                                 | 10.20 | MAP2K4,ITGB1,RAF1,GRB2,FGFR1,ITGA2,STAT3,CCND1,MET,ELF4,JUN,MAPK3,PRKCE,PTGS2,ELK3,MAP2K1,PRKD1,CDK2                                    |
|                          | Glucocorticoid Receptor Signalling                                             | 4.6   | IKBKB,AR,ANXA1,KRT5                                                                                                                     |
|                          | Role of IL-17A in Psoriasis                                                    | 2.33  | S100A9                                                                                                                                  |
|                          | TNFR2 Signalling                                                               | 1.75  | IKBKB                                                                                                                                   |
|                          | 4-1BB Signalling in T Lymphocytes                                              | 1.74  | IKBKB                                                                                                                                   |
|                          | IL-17A Signalling in Fibroblasts                                               | 1.73  | IKBKB                                                                                                                                   |
| Down-regulated           | Role of RIG1-like Receptors in Antiviral Innate Immunity                       | 1.71  | IKBKB                                                                                                                                   |
|                          | TWEAK Signalling                                                               | 1.69  | IKBKB                                                                                                                                   |
|                          | April Mediated Signalling                                                      | 1.64  | IKBKB                                                                                                                                   |
|                          | Role of PKR in Interferon Induction and Antiviral Response                     | 1.63  | IKBKB                                                                                                                                   |
|                          | B Cell Activating Factor Signalling                                            | 1.62  | IKBKB                                                                                                                                   |
|                          | IL-10 Signalling                                                               | 18.8  | TRAF6,SOCS3,IL36G,IL1RL2,IL1RAPL2,IL10,IL36RN,IL36A,IL1R1,IL1F10,LBP,CHUK,IL1RAP,IL36B                                                  |
|                          | Role of Macrophages, Fibroblasts and Endothelial Cells in Rheumatoid Arthritis | 17.7  | SRC,SOCS3,IL1RAPL2,IL10,IL36A,LTB,IL1F10,IL1R1,TLR9,IL36G,IL1RL2,IL36RN,CHUK,LBP,IL1RAP,IRAK2                                           |
|                          | Toll-like Receptor Signalling                                                  | 16.5  | TRAF6,TLR4,IL36G,IL36RN,TLR1,IL36A,IL1F10,LBP,CHUK,TLR9,IRAK2,IL36B,IRAK1                                                               |
|                          | Hepatic Cholestasis                                                            | 16.3  | IL1RAPL2,IL36A,IL1F10,IL1R1,IRAK1,IL36B,TRAF6,TLR4,IL36G,IL1RL2,IL36RN,CHUK,LBP,IL1RAP,IRAK2,IL11                                       |
|                          | IL-6 Signalling                                                                | 16.2  | TRAF6,SOCS3,IL36G,IL1RL2,IL1RAPL2,IL36RN,CRP,IL36A,IL1R1,IL1F10,LBP,CHUK,TLR9,IL1RAP,IL36B                                              |
| Different from secretory | Dendritic Cell Maturation                                                      | 15.6  | IL10,IFNB1,IL36A,LTB,IL1F10,TLR9,IL36B,TRAF6,TLR4,CD1D,IL36G,CD40,IL1RL2,IL36RN,CHUK,STAT1                                              |
|                          | p38 MAPK Signalling                                                            | 15.3  | IL1RAPL2,IL36A,IL1F10,IL1R1,IRAK1,IL36B,TRAF6,FADD,IL36G,IL1RL2,IL36RN,STAT1,IL1RAP,IRAK2                                               |
|                          | Role of Osteoblasts, Osteoclasts and Chondrocytes in Rheumatoid Arthritis      | 14.8  | SRC,IL1RAPL2,IL10,IL36A,IL1F10,IL1R1,TLR9,IL36B,TRAF6,IL36G,IL1RL2,RUNX2,IL36RN,SMAD4,CHUK,IL1RAP,IL11                                  |
|                          | Altered T Cell and B Cell Signalling in Rheumatoid Arthritis                   | 14.1  | TLR4,IL36G,CD40,IL10,IL36RN,TLR1,IL36A,LTB,IL1F10,CHUK,TLR9,IL36B                                                                       |
|                          | NF-κB Signalling                                                               | 14.1  | IL36A,IL1F10,IL1R1,TLR9,IRAK1,IL36B,TRAF6,FADD,TLR4,IL36G,CD40,IL36RN,TLR1,CHUK,FGFRL1                                                  |

The first three columns specify endometrial layers and expression state of identified miRNA as compared to the proliferative and secretory phase. The next three columns specify the canonical pathways identified using IPA in which participate the mRNA regulated by the identified miRNA.
